# Supplementary material for: A new Cd4-2,4-pyridinedicarboxylate layered coordination polymer consisting of intralayer cavities and reversible network self-adaptation upon dehydration/moisture-absorption
Source: Royal Society of Chemistry journal article supplement (doi:10.1039/b920419a), 2010-01-01
Supplement: b920419a.pdf [file b920419a.pdf]

**Electronic Supplementary Information (ESI) for  
A new Cd<sub>4</sub>-2,4-pyridinedicarboxylate layered coordination polymer consisting of  
intralayer cavities and reversible network self-adaptation upon  
dehydration/moisture-absorption**

Yen-Hsiang Liu,\* Hsiao-Ping Fang, Pei-Ci Jhang, Chia-Chien Peng, Po-Hsiu Chien, Hsiao-Ching Yang, Yun-Chieh Huang, and Yu-Lin Lo

*Department of Chemistry, Fu Jen Catholic University, Taipei 24205, Taiwan.*

**Contents:**

- Fig. S1** The metal-pyda coordination modes published in literatures and found in **FJU-3**.
- Fig. S2** The infrared spectrum (ATR-IR) of **FJU-3**.
- Fig. S3** The coordination environments of *hepta*- and *hexa*-coordinated cadmium centers in **FJU-3**.
- Fig. S4** The thermogravimetric analysis diagram of **FJU-3**.
- Fig. S5** Solid-state emission spectra of **FJU-3** and 2,4-pyda free ligand (inset) at room temperature ( $\lambda_{\text{ex}} = 320 \text{ nm}$ ).

**A. the seventeen metal-pyda coordination modes published in literatures:**

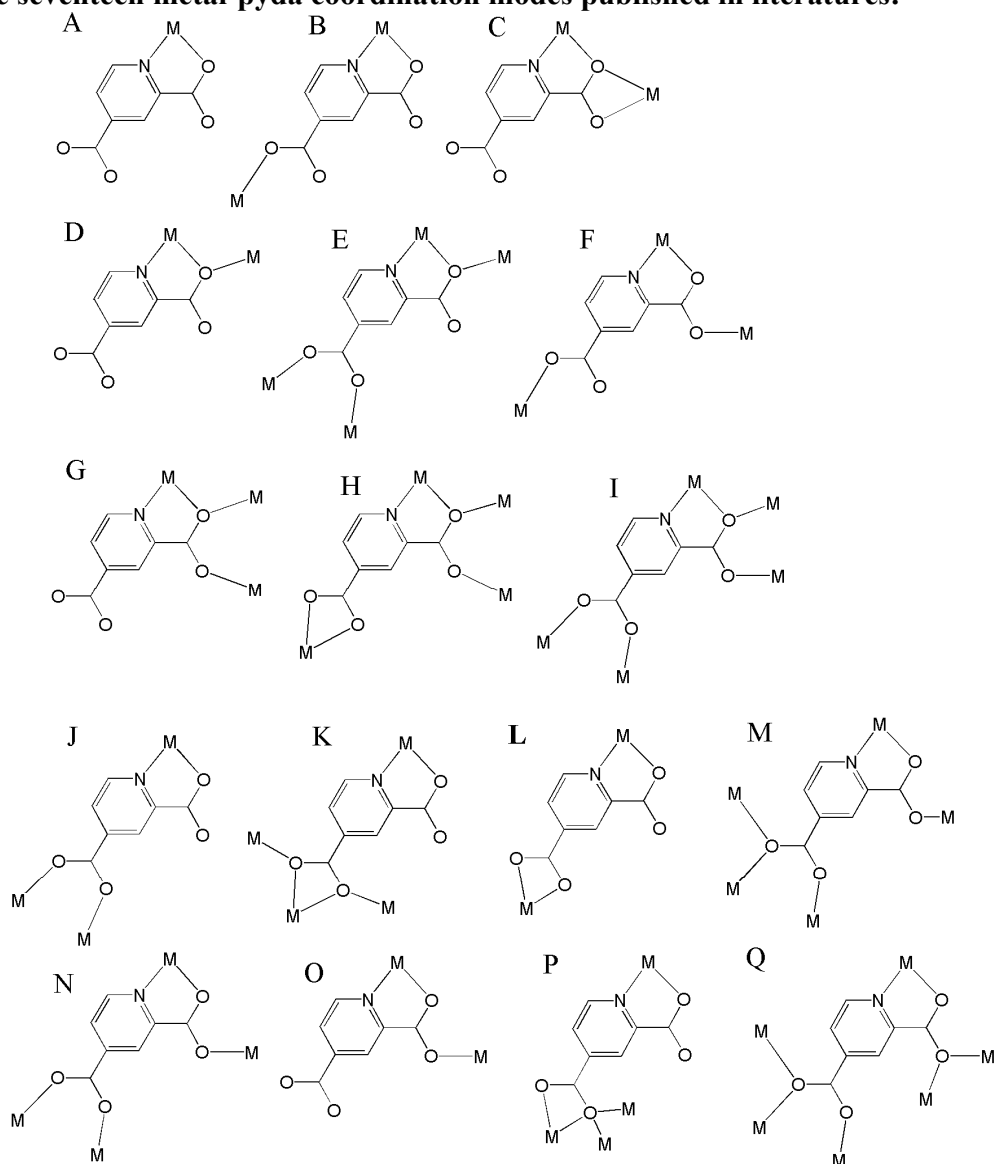

**B. Two new metal-pyda coordination modes found in FJU-3:**

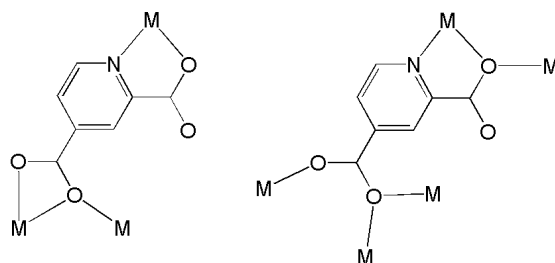

**Fig. S1** The metal-pyda coordination modes published in literatures and found in **FJU-3**.

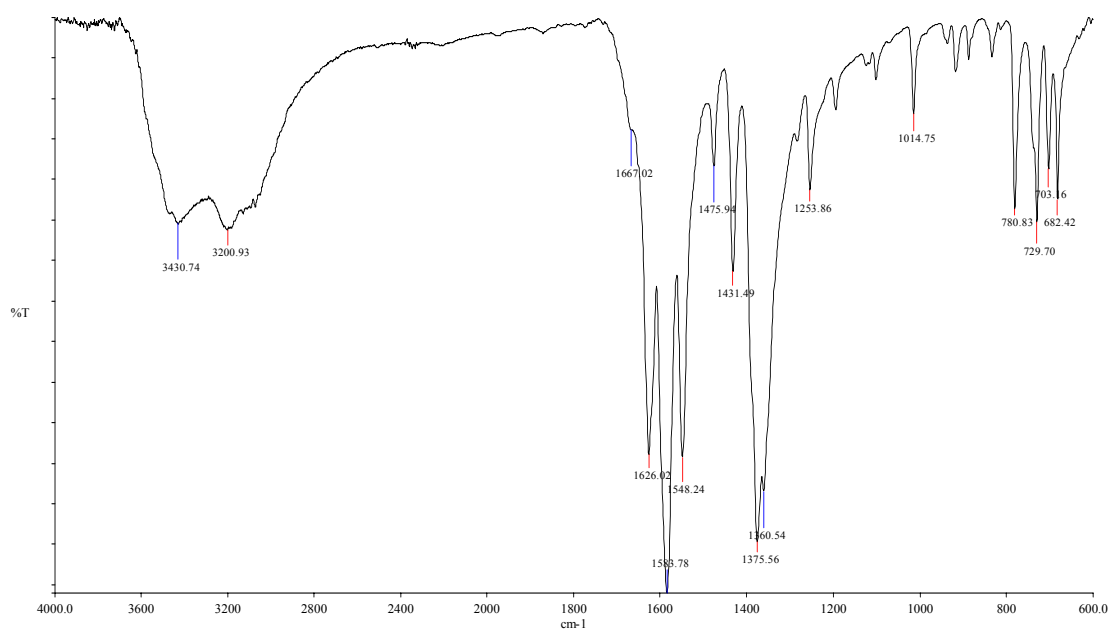

**Fig. S2** The infrared spectrum (ATR-IR) of **FJU-3**.

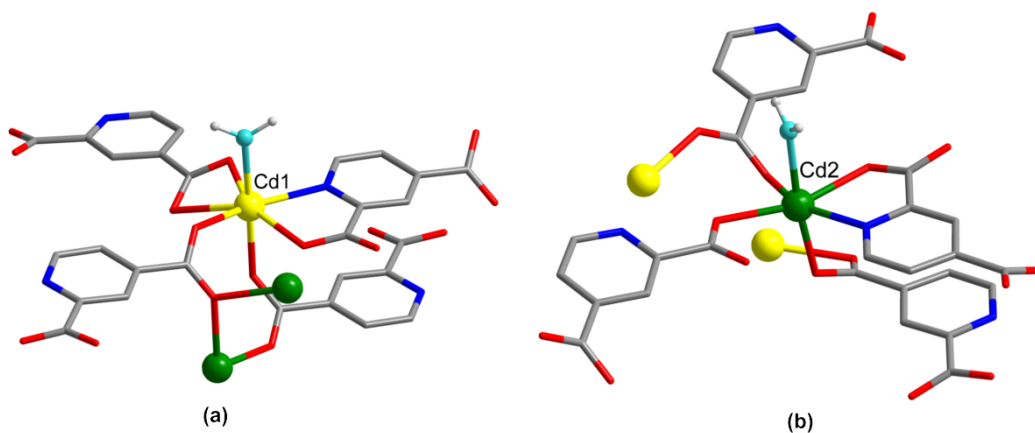

**Fig. S3** The coordination environments of *hepta*- and *hexa*-coordinated cadmium centers in **FJU-3**: (a) *hepta*-coordinated Cd1; (b) *hexa*-coordinated Cd2. Both types of cadmium centers are coordinated by one water molecule and four pyda ligands: three pyda ligands coordinated to the cadmium center in *cis*-positions with respect to the coordinated water molecule, and one pyda ligand coordinated to cadmium center in *trans*-position with respect to the coordinated water molecule. (Key: Cd1, yellow sphere; Cd2, green sphere).

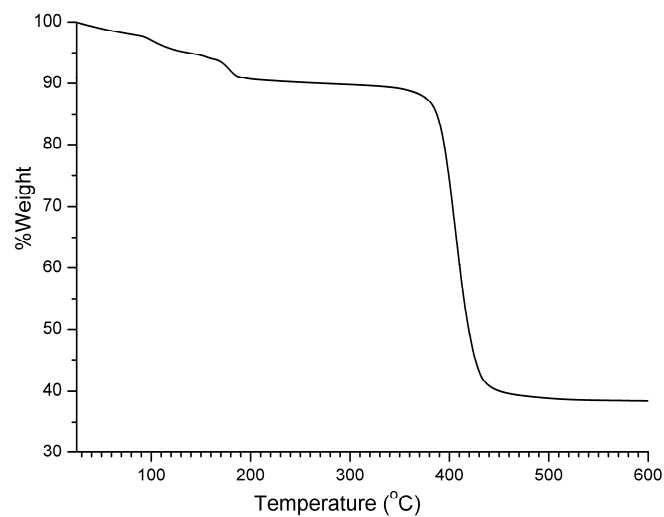

**Fig. S4** The thermogravimetric analysis diagram of **FJU-3**. The weight loss of 2.83% (calcd. 2.94%) observed between 30 and 98 °C corresponds to the loss of one water molecule, and the weight loss of 6.18% (calcd. 5.88%) observed between 98 and 190 °C corresponds to the loss of two water molecules on the basis of formula  $[\text{Cd}_2(\text{H}_2\text{O})_2(\text{C}_7\text{H}_3\text{O}_4\text{N})_2 \cdot \text{H}_2\text{O}]_n$ .

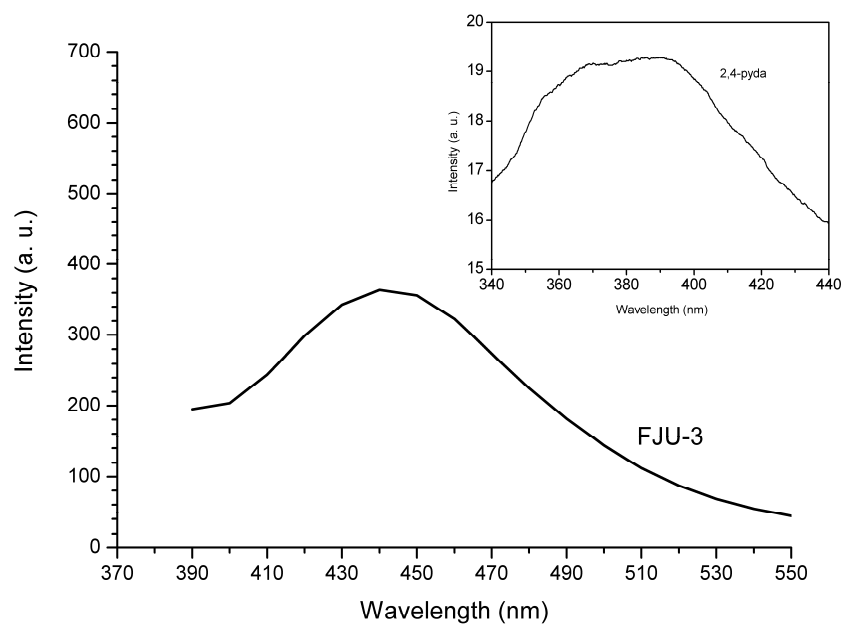

**Fig. S5** Solid-state emission spectra of **FJU-3** and 2,4-pyda free ligand (inset) at room temperature ( $\lambda_{\text{ex}} = 320$  nm).
